# Supplementary material
Source: publisher figshare collection journal article supplement (https://karger.figshare.com/ndownloader/files/14523566)
Supplement: Supplementary file 1 [file 14523566]

Supplemental Table 1: NH-CSS Score for participants

| Participant | SGA | Postnatal Growth Failure | Relative Macrocephaly at Birth | Protruding Forehead | Body Asymmetry | Feeding Difficulties | NH-CSS Score |
| --- | --- | --- | --- | --- | --- | --- | --- |
| 1 | Yes | Yes | No | No | No | No | 2 |
| 2 | Yes | Yes | n/a | n/a | n/a | No | 2 |
| 3 | Yes | n/a | No | n/a | n/a | n/a | 1 |
| 4 | Yes | Yes | n/a | Yes | No | Yes | 4 |
| 5 | Yes | Yes | No | n/a | n/a | Yes | 3 |
| 6 | Yes | Yes | Yes | n/a | n/a | n/a | 3 |
| 7 | Yes | Yes | n/a | n/a | n/a | No | 2 |
| 8 | Yes | Yes | No | n/a | No | Yes | 3 |
| 9 | No | Yes | n/a | n/a | n/a | Yes | 2 |
| 10 | Yes | n/a | n/a | n/a | n/a | n/a | 1 |
| 11 | No | Yes | n/a | n/a | No | No | 1 |
| 12 | Yes | Yes | Yes | n/a | No | Yes | 4 |
| 13 | Yes | Yes | No | n/a | n/a | Yes | 3 |
| 14 | Yes | Yes | n/a | n/a | n/a | Yes | 3 |

SGA: Small for Gestation Age, HC: Head Circumference, Height SDS: Height Standard Deviation Score; n/a: not available; NH-CSS: Netchine–Harbison clinical scoring system
